# Supplementary material for: Temporal Variations in Chemical Proprieties of Waterbodies within Coastal Polders: Forecast Modeling for Optimizing Water Management Decisions
Source: MDPI journal article supplement (doi:10.3390/agriculture13061162), 2023-05-30
Supplement: s1 [file s1]

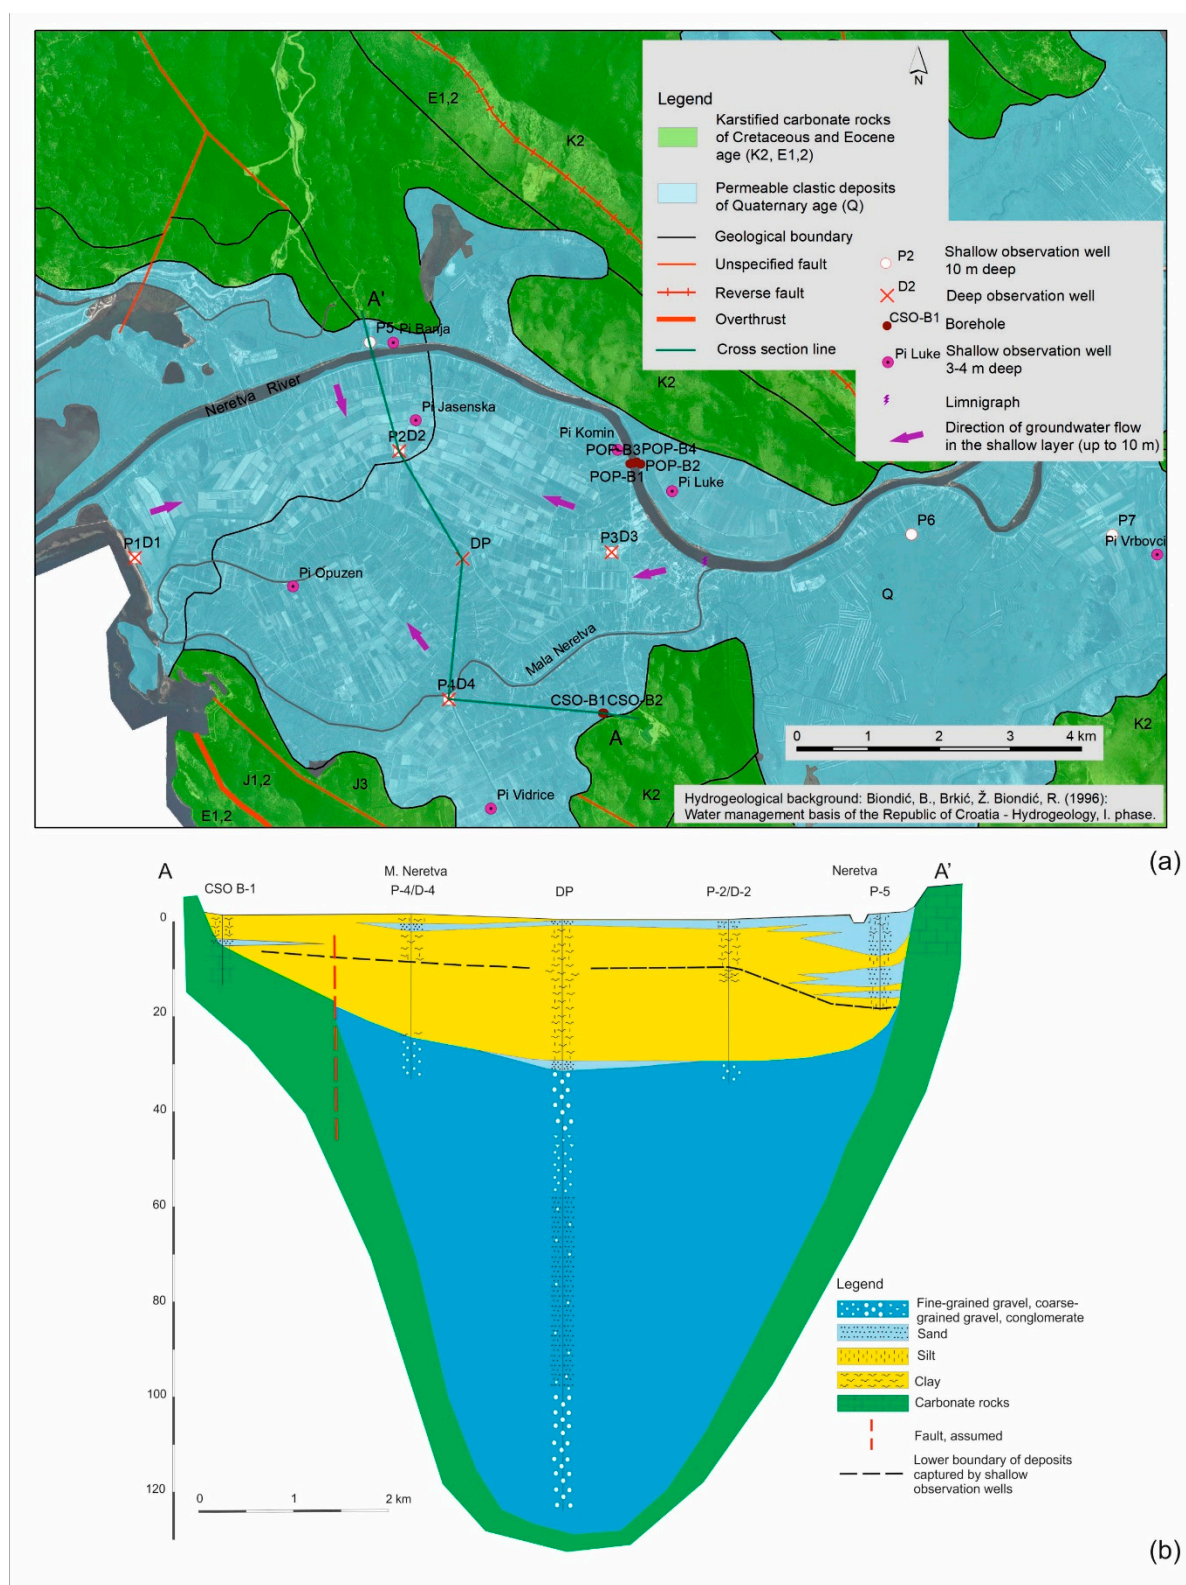

**Figure S1.** Hydrogeological map (a) and cross section of the Neretva River valley (b)

**Table S1.** Surface and groundwater quality monitoring locations (NRD, Croatia) grouped into four water classes and important characteristics of each class

| Water body    | Water class                        | Monitoring location | Description                                                                                                                                                                                                                          |
|---------------|------------------------------------|---------------------|--------------------------------------------------------------------------------------------------------------------------------------------------------------------------------------------------------------------------------------|
| Surface water | RIVER /<br>LATERAL CANAL<br>(R/LC) | R Neretva           | Fed by rainfall, runoff from upstream fields, and small tributaries and springs that convey water to the main rivers and side canals                                                                                                 |
|               |                                    | R Mala Neretva      |                                                                                                                                                                                                                                      |
|               |                                    | LC Vrbovci          |                                                                                                                                                                                                                                      |
|               |                                    | LC Vidrice          |                                                                                                                                                                                                                                      |
|               | PUMPING STATION<br>(PS)            | PS Luke             | Refers to water supplied by pumping stations within the polders; the groundwater table and water level in the canals are determined by the flood control project                                                                     |
|               |                                    | PS Vrbovci          |                                                                                                                                                                                                                                      |
|               |                                    | PS Vidrice          |                                                                                                                                                                                                                                      |
|               |                                    | PS Opuzen           |                                                                                                                                                                                                                                      |
|               | DRAINAGE CANAL<br>(DC)             | DC Luke             | Together with pumping station drainage canals collect water from the polder and the quality may be greatly affected by agricultural land use                                                                                         |
|               |                                    | DC Vrbovci          |                                                                                                                                                                                                                                      |
|               |                                    | DC Vidrice          |                                                                                                                                                                                                                                      |
|               |                                    | DC Opuzen           |                                                                                                                                                                                                                                      |
|               |                                    | DC Jasenska         |                                                                                                                                                                                                                                      |
|               |                                    | DC Komin            |                                                                                                                                                                                                                                      |
|               |                                    | DC Banja            |                                                                                                                                                                                                                                      |
| Groundwater   | PIEZOMETER (Pi)                    | Pi Luke             | Sampled from groundwater wells i.e. piezometers consisting of 4 m long plastic pipe with a diameter of 110 mm and a porous section at the bottom; positioned at the location within the polder that represents the dominant land use |
|               |                                    | Pi Vrbovci          |                                                                                                                                                                                                                                      |
|               |                                    | Pi Vidrice          |                                                                                                                                                                                                                                      |
|               |                                    | Pi Opuzen           |                                                                                                                                                                                                                                      |
|               |                                    | Pi Jasenska         |                                                                                                                                                                                                                                      |
|               |                                    | Pi Komin            |                                                                                                                                                                                                                                      |
|               |                                    | Pi Banja            |                                                                                                                                                                                                                                      |

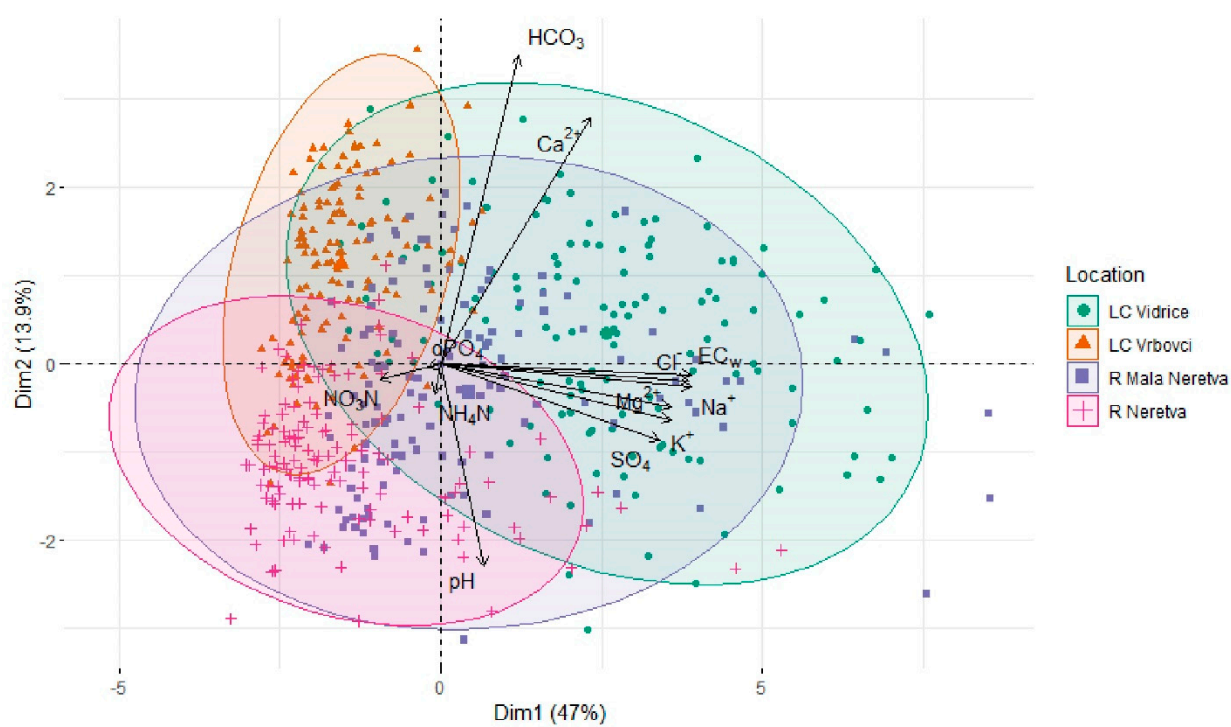

**Figure S2.** PCA Biplot Class 1 RIVER/LATERAL CANAL (R/LC)

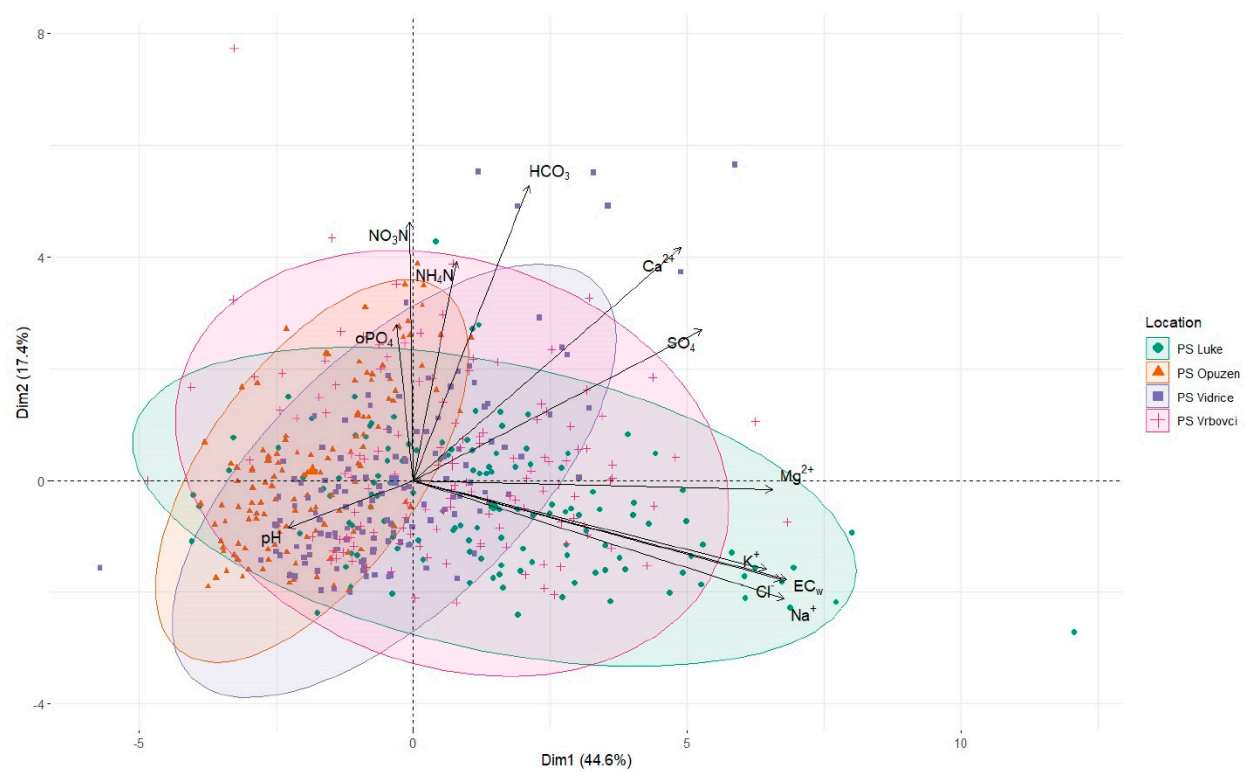

**Figure S3.** PCA Biplot Class 2 PUMPING STATION (PS)

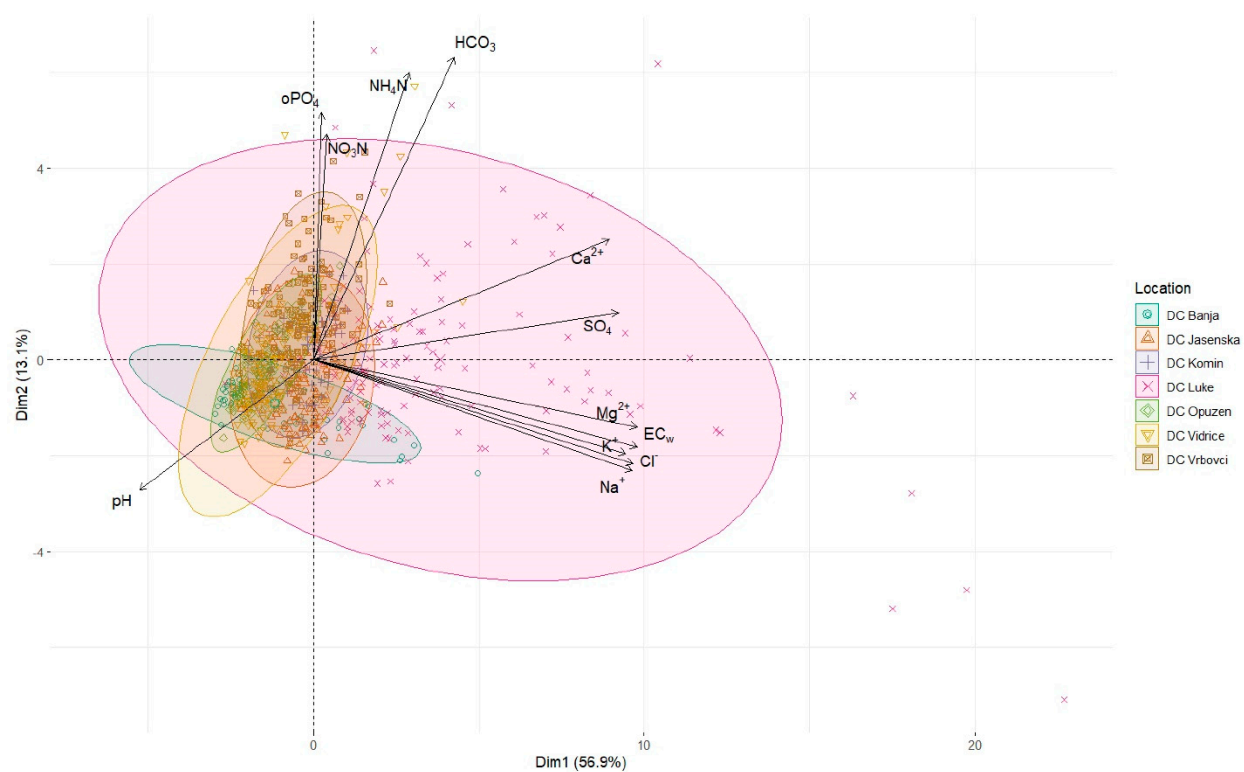

**Figure S4.** PCA Biplot Class 3 DRAINAGE CANAL (DC)

**Table S2.** Results for the PCA variable contributions in the first five dimensions for each water class

| Class                             | Dimensions | Variable contributions |                 |                  |                  |                |                 |                               |                 |                               |                   |                    |                    |
|-----------------------------------|------------|------------------------|-----------------|------------------|------------------|----------------|-----------------|-------------------------------|-----------------|-------------------------------|-------------------|--------------------|--------------------|
|                                   |            | pH                     | EC <sub>w</sub> | Ca <sup>2+</sup> | Mg <sup>2+</sup> | K <sup>+</sup> | Na <sup>+</sup> | HCO <sub>3</sub> <sup>-</sup> | Cl <sup>-</sup> | SO <sub>4</sub> <sup>2-</sup> | o-PO <sub>4</sub> | NO <sub>3</sub> -N | NH <sub>4</sub> -N |
| RIVER/<br>LATERAL CANAL<br>(R/LC) | Dim.1      | 0.25                   | 12              | 9.2              | 15               | 10             | 17              | 6.2                           | 17              | 13                            | 0.10              | 0.76               | 0.01               |
|                                   | Dim.2      | 19                     | 11              | 16               | 0.43             | 13             | 0.23            | 32                            | 0.18            | 2.0                           | 4.6               | 1.5                | 0.42               |
|                                   | Dim.3      | 7.2                    | 1.5             | 0.03             | 0.30             | 0.52           | 0.04            | 0.31                          | 0.00            | 0.38                          | 44                | 6.9                | 39                 |
|                                   | Dim.4      | 26                     | 3.4             | 0.01             | 0.03             | 3.1            | 0.30            | 1.6                           | 0.36            | 1.4                           | 9.7               | 46                 | 8.0                |
|                                   | Dim.5      | 1.2                    | 0.24            | 2.0              | 0.45             | 0.42           | 0.04            | 2.8                           | 0.02            | 3.0                           | 13                | 28                 | 49                 |
| PUMPING<br>STATION (PS)           | Dim.1      | 1.8                    | 16              | 8.4              | 15               | 15             | 16              | 1.6                           | 16              | 9.8                           | 0.03              | 0.00               | 0.22               |
|                                   | Dim.2      | 0.63                   | 2.8             | 16               | 0.02             | 2.3            | 4.0             | 25                            | 2.8             | 6.6                           | 7.0               | 19                 | 14                 |
|                                   | Dim.3      | 34                     | 0.01            | 0.47             | 1.1              | 1.4            | 0.01            | 0.67                          | 0.47            | 0.10                          | 39                | 11                 | 13                 |
|                                   | Dim.4      | 40                     | 0.12            | 0.02             | 0.16             | 0.41           | 0.02            | 6.8                           | 0.02            | 2.1                           | 23                | 25                 | 2.9                |
|                                   | Dim.5      | 17                     | 0.18            | 4.5              | 0.59             | 1.1            | 0.34            | 8.6                           | 0.01            | 1.9                           | 1.9               | 0.01               | 64                 |
| DRAINAGE CANAL<br>(DC)            | Dim.1      | 4.0                    | 14              | 12               | 14               | 13             | 14              | 2.6                           | 14              | 12                            | 0.01              | 0.02               | 1.2                |
|                                   | Dim.2      | 4.6                    | 2.1             | 4.0              | 1.2              | 2.4            | 3.4             | 25                            | 3.0             | 0.62                          | 17                | 14                 | 23                 |
|                                   | Dim.3      | 1.0                    | 0.02            | 2.1              | 0.01             | 0.35           | 0.13            | 0.49                          | 0.22            | 1.7                           | 38                | 55                 | 0.53               |
|                                   | Dim.4      | 46                     | 0.12            | 0.98             | 0.48             | 2.6            | 0.44            | 14                            | 0.53            | 0.29                          | 6.3               | 2.7                | 26                 |
|                                   | Dim.5      | 0.75                   | 0.21            | 0.12             | 0.13             | 0.24           | 0.40            | 6.5                           | 0.36            | 0.07                          | 38                | 22                 | 32                 |
| PIEZOMETER (Pi)                   | Dim.1      | 0.97                   | 13              | 1.0              | 12               | 11             | 13              | 13                            | 13              | 0.80                          | 10                | 0.04               | 12                 |
|                                   | Dim.2      | 6.5                    | 0.40            | 43               | 1.6              | 4.4            | 0.04            | 0.00                          | 0.07            | 41                            | 0.10              | 3.0                | 0.05               |
|                                   | Dim.3      | 15                     | 0.02            | 0.00             | 0.23             | 1.3            | 0.00            | 0.71                          | 0.03            | 1.4                           | 0.01              | 81                 | 0.40               |
|                                   | Dim.4      | 75                     | 0.02            | 1.4              | 0.93             | 0.07           | 0.08            | 0.02                          | 0.08            | 8.5                           | 1.1               | 12                 | 0.90               |
|                                   | Dim.5      | 0.46                   | 5.6             | 2.8              | 7.8              | 0.52           | 3.2             | 3.3                           | 4.2             | 8.1                           | 45                | 0.00               | 19                 |

**Table S3.** PCA results - eigenvalues, variance (%) and cumulative variance (%) of surface water body and associated water classes

| Water body          |            | SURFACE WATER                     |                         |
|---------------------|------------|-----------------------------------|-------------------------|
| Principal component | Eigenvalue | Variance (%)                      | Cumulative variance (%) |
| PCOMP 1             | 6.915      | 57.63                             | 57.63                   |
| PCOMP 2             | 1.494      | 12.45                             | 70.08                   |
| PCOMP 3             | 1.017      | 8.47                              | 78.55                   |
| PCOMP 4             | 0.835      | 6.96                              | 85.51                   |
| PCOMP 5             | 0.728      | 6.07                              | 91.58                   |
| PCOMP 6             | 0.560      | 4.67                              | 96.25                   |
| PCOMP 7             | 0.262      | 2.18                              | 98.43                   |
| PCOMP 8             | 0.086      | 0.71                              | 99.14                   |
| PCOMP 9             | 0.044      | 0.37                              | 99.51                   |
| PCOMP 10            | 0.036      | 0.29                              | 99.80                   |
| PCOMP 11            | 0.014      | 0.12                              | 99.92                   |
| PCOMP 12            | 0.009      | 0.08                              | 100.0                   |
| Water class         |            | 1. RIVER / LATERAL CANAL (R / LC) |                         |
| Principal component | Eigenvalue | Variance (%)                      | Cumulative variance (%) |
| PCOMP 1             | 5.580      | 46.50                             | 46.50                   |
| PCOMP 2             | 1.569      | 13.08                             | 59.58                   |
| PCOMP 3             | 1.171      | 9.76                              | 69.34                   |
| PCOMP 4             | 1.076      | 8.96                              | 78.30                   |
| PCOMP 5             | 0.875      | 7.29                              | 85.59                   |
| PCOMP 6             | 0.747      | 6.22                              | 91.81                   |
| PCOMP 7             | 0.497      | 4.14                              | 95.95                   |
| PCOMP 8             | 0.163      | 1.35                              | 97.30                   |
| PCOMP 9             | 0.137      | 1.14                              | 98.44                   |
| PCOMP 10            | 0.107      | 0.89                              | 99.33                   |
| PCOMP 11            | 0.054      | 0.45                              | 99.78                   |
| PCOMP 12            | 0.026      | 0.22                              | 100.0                   |
| Water class         |            | 2. PUMPING STATION (PS)           |                         |
| Principal component | Eigenvalue | Variance (%)                      | Cumulative variance (%) |
| PCOMP 1             | 5.353      | 44.60                             | 44.60                   |
| PCOMP 2             | 2.094      | 17.45                             | 62.05                   |
| PCOMP 3             | 1.218      | 10.15                             | 72.20                   |
| PCOMP 4             | 0.775      | 6.45                              | 78.65                   |
| PCOMP 5             | 0.757      | 6.30                              | 84.95                   |
| PCOMP 6             | 0.668      | 5.57                              | 90.52                   |
| PCOMP 7             | 0.407      | 3.39                              | 93.91                   |
| PCOMP 8             | 0.362      | 3.02                              | 96.93                   |
| PCOMP 9             | 0.166      | 1.38                              | 98.31                   |
| PCOMP 10            | 0.114      | 0.95                              | 99.26                   |
| PCOMP 11            | 0.053      | 0.45                              | 99.71                   |
| PCOMP 12            | 0.035      | 0.29                              | 100.0                   |
| Water class         |            | 3. DRAINAGE CANAL (DC)            |                         |
| Principal component | Eigenvalue | Variance (%)                      | Cumulative variance (%) |

|          |       |       |       |
|----------|-------|-------|-------|
| PCOMP 1  | 6.825 | 56.87 | 56.87 |
| PCOMP 2  | 1.571 | 13.09 | 69.96 |
| PCOMP 3  | 1.044 | 8.70  | 78.66 |
| PCOMP 4  | 0.848 | 7.07  | 85.73 |
| PCOMP 5  | 0.745 | 6.21  | 91.94 |
| PCOMP 6  | 0.580 | 4.83  | 96.77 |
| PCOMP 7  | 0.258 | 2.15  | 98.92 |
| PCOMP 8  | 0.070 | 0.58  | 99.50 |
| PCOMP 9  | 0.027 | 0.23  | 99.73 |
| PCOMP 10 | 0.020 | 0.16  | 99.89 |
| PCOMP 11 | 0.008 | 0.07  | 99.96 |
| PCOMP 12 | 0.005 | 0.04  | 100.0 |



**Table S4.** PCA results - eigenvalues, variance (%) and cumulative variance (%) of groundwater body /class piezometer

| Water body (class)  | GROUNDWATER (PIEZOMETER) |              |                         |
|---------------------|--------------------------|--------------|-------------------------|
| Principal component | Eigenvalue               | Variance (%) | Cumulative variance (%) |
| PCOMP 1             | 7.320                    | 61.00        | 61.00                   |
| PCOMP 2             | 1.854                    | 15.45        | 76.45                   |
| PCOMP 3             | 1.034                    | 8.62         | 85.07                   |
| PCOMP 4             | 0.861                    | 7.18         | 92.25                   |
| PCOMP 5             | 0.395                    | 3.29         | 95.54                   |
| PCOMP 6             | 0.214                    | 1.79         | 97.33                   |
| PCOMP 7             | 0.122                    | 1.02         | 98.35                   |
| PCOMP 8             | 0.082                    | 0.69         | 99.04                   |
| PCOMP 9             | 0.051                    | 0.42         | 99.46                   |
| PCOMP 10            | 0.034                    | 0.28         | 99.74                   |
| PCOMP 11            | 0.024                    | 0.20         | 99.94                   |
| PCOMP 12            | 0.007                    | 0.06         | 100.0                   |

**Table S5.** Augmented Dickey-Fuller stationarity test results for all location and water quality parameters with lag orders and calculated *p*-values

| Water class                          | Location       | Lag order | Parameters |                 |                  |                  |                |                 |                               |                 |                               |                   |                    |                    |
|--------------------------------------|----------------|-----------|------------|-----------------|------------------|------------------|----------------|-----------------|-------------------------------|-----------------|-------------------------------|-------------------|--------------------|--------------------|
|                                      |                |           | pH         | EC <sub>w</sub> | Ca <sup>2+</sup> | Mg <sup>2+</sup> | K <sup>+</sup> | Na <sup>+</sup> | HCO <sub>3</sub> <sup>-</sup> | Cl <sup>-</sup> | SO <sub>4</sub> <sup>2-</sup> | o-PO <sub>4</sub> | NO <sub>3</sub> -N | NH <sub>4</sub> -N |
|                                      |                |           | p-value    |                 |                  |                  |                |                 |                               |                 |                               |                   |                    |                    |
| RIVER/<br>LATERAL<br>CANAL<br>(R/LC) | R Neretva      | 5         | 0.01       | 0.01            | 0.03             | 0.02             | 0.03           | 0.01            | 0.01                          | 0.01            | 0.23                          | 0.38              | 0.01               | 0.14               |
|                                      | R Mala Neretva | 5         | 0.01       | 0.01            | 0.01             | 0.01             | 0.01           | 0.01            | 0.01                          | 0.01            | 0.02                          | 0.02              | 0.01               | 0.03               |
|                                      | LC Vidrice     | 5         | 0.01       | 0.01            | 0.01             | 0.01             | 0.01           | 0.01            | 0.01                          | 0.01            | 0.01                          | 0.46              | 0.01               | 0.16               |
|                                      | LC Vrbovci     | 5         | 0.01       | 0.01            | 0.01             | 0.01             | 0.01           | 0.01            | 0.04                          | 0.01            | 0.05                          | 0.55              | 0.01               | 0.23               |
| PUMPING<br>STATION<br>(PS)           | PS Luke        | 5         | 0.01       | 0.01            | 0.01             | 0.01             | 0.01           | 0.01            | 0.01                          | 0.01            | 0.01                          | 0.44              | 0.12               | 0.07               |
|                                      | PS Opuzen      | 5         | 0.01       | 0.01            | 0.01             | 0.01             | 0.01           | 0.02            | 0.01                          | 0.01            | 0.01                          | 0.09              | 0.01               | 0.01               |
|                                      | PS Vidrice     | 5         | 0.01       | 0.01            | 0.01             | 0.01             | 0.01           | 0.01            | 0.01                          | 0.01            | 0.01                          | 0.05              | 0.01               | 0.01               |
|                                      | PS Vrbovci     | 5         | 0.01       | 0.01            | 0.01             | 0.01             | 0.01           | 0.01            | 0.01                          | 0.01            | 0.01                          | 0.01              | 0.01               | 0.08               |
| DRAINAGE<br>CANAL<br>(DC)            | DC Luke        | 5         | 0.01       | 0.01            | 0.01             | 0.01             | 0.01           | 0.01            | 0.02                          | 0.01            | 0.01                          | 0.04              | 0.01               | 0.02               |
|                                      | DC Opuzen      | 5         | 0.01       | 0.01            | 0.01             | 0.01             | 0.01           | 0.01            | 0.01                          | 0.01            | 0.01                          | 0.09              | 0.01               | 0.01               |
|                                      | DC Vidrice     | 5         | 0.01       | 0.04            | 0.01             | 0.02             | 0.01           | 0.04            | 0.01                          | 0.07            | 0.01                          | 0.01              | 0.01               | 0.01               |
|                                      | DC Jasenska    | 5         | 0.31       | 0.01            | 0.01             | 0.01             | 0.01           | 0.01            | 0.01                          | 0.01            | 0.01                          | 0.03              | 0.01               | 0.01               |
|                                      | DC Vrbovci     | 5         | 0.04       | 0.01            | 0.01             | 0.01             | 0.01           | 0.01            | 0.01                          | 0.01            | 0.01                          | 0.01              | 0.01               | 0.01               |
|                                      | DC Komin       | 4         | 0.10       | 0.02            | 0.01             | 0.01             | 0.01           | 0.01            | 0.01                          | 0.01            | 0.01                          | 0.01              | 0.01               | 0.31               |
|                                      | DC Banja       | 4         | 0.08       | 0.01            | 0.01             | 0.01             | 0.01           | 0.01            | 0.01                          | 0.01            | 0.01                          | 0.04              | 0.01               | 0.53               |
| PIEZOMETER<br>(Pi)                   | Pi Luke        | 4         | 0.01       | 0.52            | 0.30             | 0.36             | 0.63           | 0.42            | 0.66                          | 0.51            | 0.25                          | 0.06              | 0.09               | 0.01               |
|                                      | Pi Opuzen      | 5         | 0.01       | 0.26            | 0.01             | 0.01             | 0.27           | 0.19            | 0.01                          | 0.26            | 0.04                          | 0.01              | 0.01               | 0.21               |
|                                      | Pi Vidrice     | 5         | 0.01       | 0.01            | 0.43             | 0.01             | 0.04           | 0.01            | 0.01                          | 0.01            | 0.10                          | 0.91              | 0.29               | 0.01               |
|                                      | Pi Jasenska    | 5         | 0.01       | 0.01            | 0.38             | 0.04             | 0.08           | 0.05            | 0.02                          | 0.01            | 0.30                          | 0.03              | 0.03               | 0.02               |
|                                      | Pi Vrbovci     | 5         | 0.01       | 0.06            | 0.04             | 0.01             | 0.17           | 0.17            | 0.09                          | 0.36            | 0.11                          | 0.08              | 0.02               | 0.01               |
|                                      | Pi Komin       | 4         | 0.02       | 0.13            | 0.32             | 0.10             | 0.07           | 0.02            | 0.07                          | 0.02            | 0.68                          | 0.62              | 0.08               | 0.01               |
|                                      | Pi Banja       | 4         | 0.01       | 0.88            | 0.19             | 0.35             | 0.04           | 0.32            | 0.09                          | 0.79            | 0.24                          | 0.02              | 0.06               | 0.79               |
